# Supplementary material for: On reliable discovery of molecular signatures
Source: PubMed Central journal article supplement (PMC2646701; doi:10.1186/1471-2105-10-38), 2009-01-29
Supplement: 1471-2105-10-38-S1.pdf [file 1471-2105-10-38-S1.pdf]

**ON RELIABLE DISCOVERY OF MOLECULAR SIGNATURES  
 ADDITIONAL FILE 1:  
 OPTIMALITY AND UNIQUENESS OF  $S^*$**

The notation here is the same as in the paper. Sets are used as indexes  $X_S$  to denote  $(X_i)_{i \in S}$ . The complement of a set  $S$  is denoted  $\neg S$ , and we write  $X_{\neg i}$  for all elements of  $X$  except  $X_i$ . Probability density functions (over the continuous  $\mathcal{X}$ ) are denoted  $f$ , while or probability mass functions (over the discrete  $\mathcal{Y}$ ) are denoted  $p$ .

We first state our definition of  $S^*$ .

**Definition 1.** For any set  $S \subseteq \{1, \dots, n\}$ , let  $g_S^*$  denote the optimal classifier over the corresponding domain  $\mathcal{X}_S$ . The optimal signature is defined as

$$S^* = \{i : R(g_{\neg i}^*) > R(g^*)\},$$

where for any classifier  $g$  we define  $R(g) = P(g(X) \neq Y)$ .

The following establishes uniqueness of the optimal classifier  $g^*$ , and thereby uniqueness of  $S^*$ .

**Theorem 2.** For any  $f(x, y)$  such that  $P(p(y | X) = 1/2) = 0$ , the optimal classifier is unique, that is,

$$P(g(X) \neq g^*(X)) > 0 \iff R(g) > R(g^*)$$

for all classifiers  $g$ .

*Proof.* Take any classifier  $g$  and fix an  $y \in \mathcal{Y}$ . We have that

$$\begin{aligned} P(g(x) \neq Y) - P(g^*(x) \neq Y) &= (2p(y | x) - 1)(1_{\{g^*(x)=y\}} - 1_{\{g(x)=y\}}) \\ &= |2p(y | x) - 1| 1_{\{g^*(x) \neq g(x)\}}. \end{aligned}$$

Integrating with respect to  $f(x)dx$  we obtain

$$R(g) - R(g^*) = \int_{\mathcal{X}} |2p(y | x) - 1| 1_{\{g^*(x) \neq g(x)\}} f(x) dx.$$

The assumption  $P(p(y | X) = 1/2) = 0$  is equivalent to  $|2p(y | x) - 1| > 0$  with probability 1. Therefore, the integral is positive if and only if

$$\int_{\mathcal{X}} 1_{\{g^*(x) \neq g(x)\}} f(x) dx = P(g(X) \neq g^*(X)) > 0.$$

□

The following lemma establishes an equivalent formulation of  $S^*$  which is useful in proving its optimality.

**Lemma 3.** For any  $f(x, y)$  such that  $P(p(y | X) = 1/2) = 0$ , it holds that

$$S^* = \{i : P(g^*(X) \neq g_{\neg i}^*(X_{\neg i})) > 0\}$$

*Proof.* Follows immediately the definition and Lemma 2. □

We now prove that  $g_{S^*}^*$  is optimal for strictly positive distributions.

**Theorem 4.** *For any  $f(x, y)$  satisfying  $f(x) > 0$  and  $P(p(y | X) = 1/2) = 0$ , the set  $S^*$  satisfies  $g_{S^*}^*(X_{S^*}) = g^*(X)$  with probability 1.*

*Proof.* Take any  $i, j \notin S^*$ . By Lemma 3,  $g^*(X) = g_{-i}^*(X_{-i}) = g_{-j}^*(X_{-j})$  with probability 1. We will show this implies that  $g^*(X)$  is constant with respect to  $X_{i,j}$  with probability 1. To see this, fix any  $x$  and assume to the contrary that there exists a point

$$x' = (x_{-\{i,j\}}, x'_{i,j})$$

such that  $g^*(x) \neq g^*(x')$ . Then we can construct a third point

$$x'' = (x_{-\{i,j\}}, x_i, x'_j),$$

and by the assumptions this point must satisfy both

$$g^*(x'') = g_{-i}^*(x''_{-i}) = g_{-i}^*(x'_{-i}) = g^*(x')$$

and

$$g^*(x'') = g_{-j}^*(x''_{-j}) = g_{-j}^*(x_{-j}) = g^*(x).$$

Since  $f(x'') > 0$ , this is a contradiction. Therefore we must have

$$g^*(X) = g_{-\{i,j\}}^*(X_{-\{i,j\}})$$

with probability 1. Repeating this argument for each element of  $\neg S^*$  yields the result.  $\square$
