# Supplementary material for: On reliable discovery of molecular signatures
Source: PubMed Central journal article supplement (PMC2646701; doi:10.1186/1471-2105-10-38), 2009-01-29

## Additional File 2

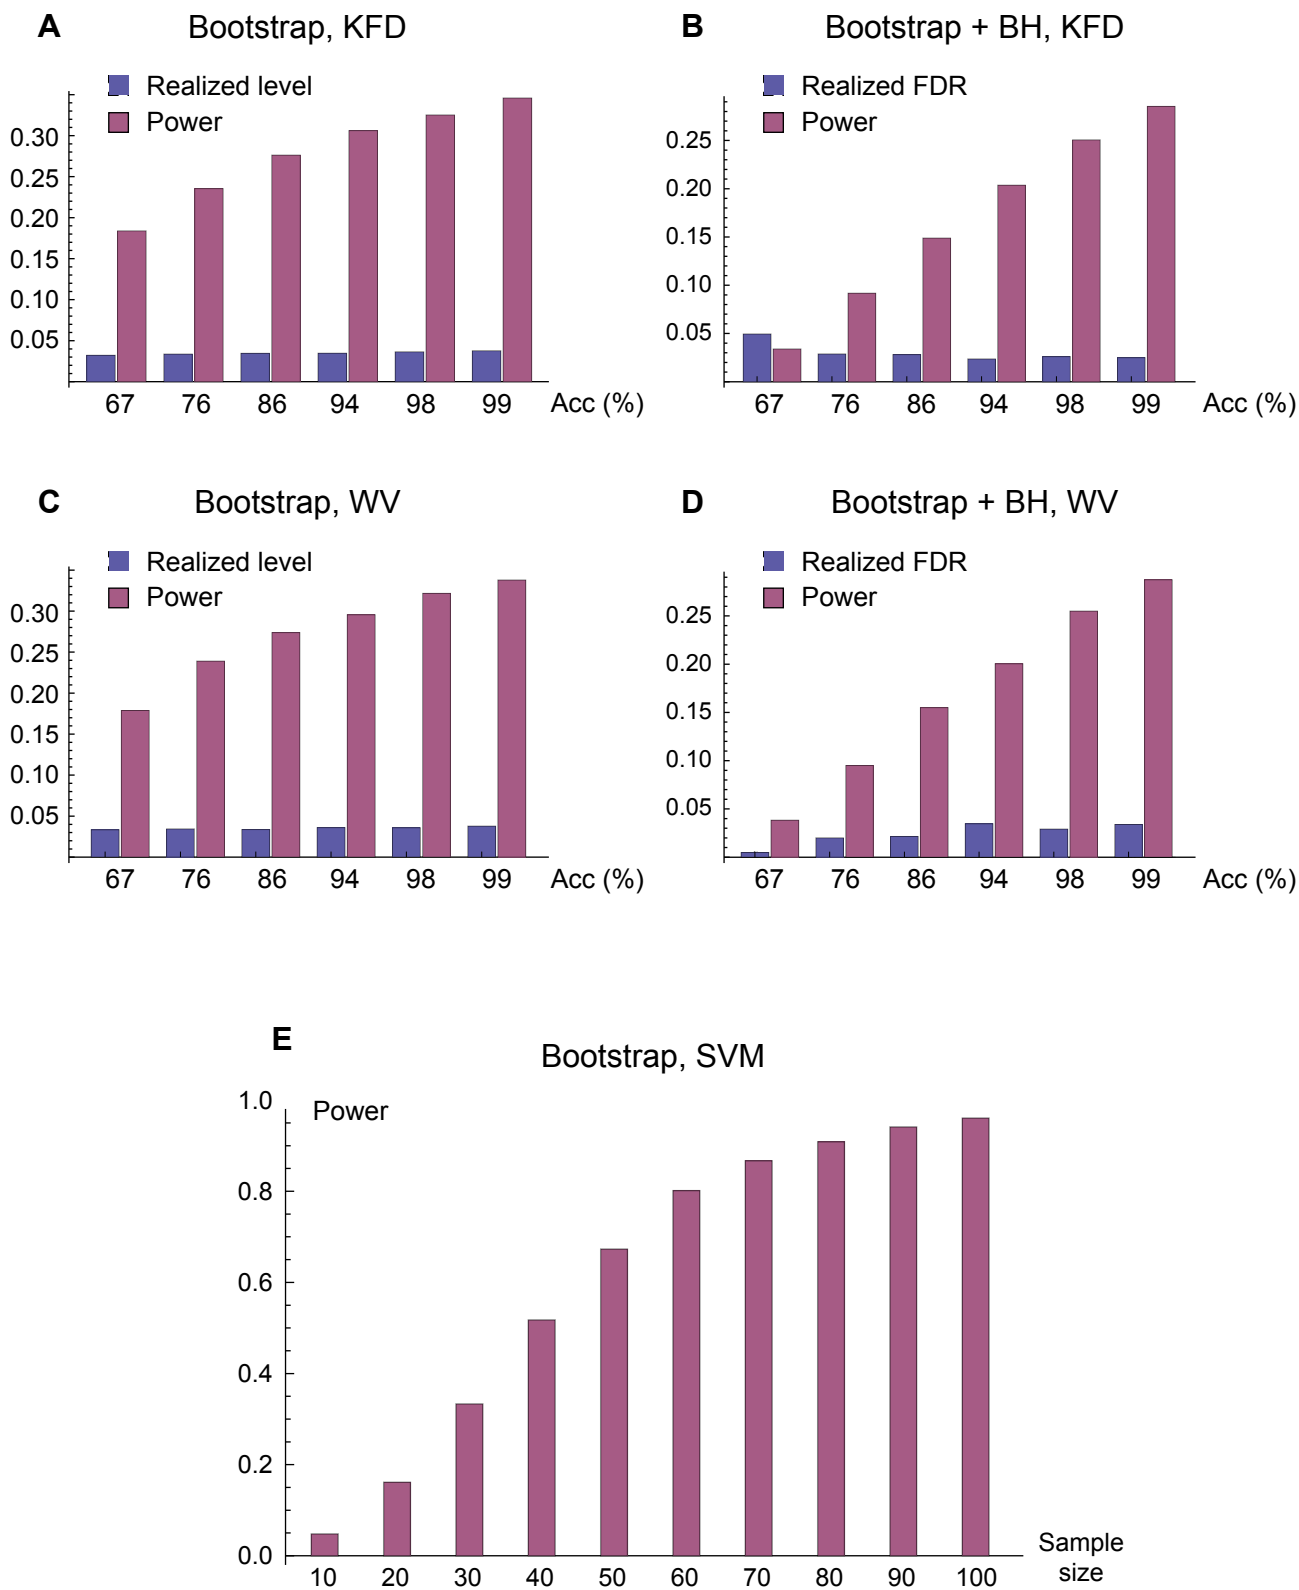

Supplement: 1471-2105-10-38-S2.pdf [file 1471-2105-10-38-S2.pdf]
